# Supplementary material for: Genetic Bypass of Aspergillus nidulans crzA Function in Calcium Homeostasis
Source: PubMed Central journal article supplement (PMC3704241; doi:10.1534/g3.113.005983), 2013-07-01
Supplement: supp_g3.113.005983_FigureS4.pdf [file supp_g3.113.005983_FigureS4.pdf]

a)

|                   |                |
|-------------------|----------------|
| <b>Consensus</b>  | PxIxIT         |
| VIVIT             | PVIVIT         |
| NFAT1             | PRIEIT         |
| TRESK             | PQIIIS         |
| Crz1              | PIISIQ         |
| Slm1              | PNIYIQ         |
| Slm2              | PEFYIE         |
| Hph1              | PVIAVN         |
| RCAN1             | PSVVVH         |
| Rcn1              | GAITID         |
| Rcn2              | PSITVN         |
| Rcn1 (Dm)         | PAIIVH         |
| <b>folA (mut)</b> | PAVL <b>NS</b> |

b)

|             |                         |
|-------------|-------------------------|
| NFAT1       | ESILLVPP-----TW--PKPLVP |
| NFAT2       | DQYLAVPQ--HPYQWAKPKPLSP |
| NFAT3       | MDYLAVPS---PLAWSKARIGGH |
| NFAT4       | DQFLSVPS---PFTWSKPKPGHT |
| DSCR1       | KQFLISPPASPPVGWKQVEDATP |
| <b>folA</b> | LRNIQLPLPAAPDPWHRNGKPQP |

**Figure S4** a) Calcineurin docking sequences in various interacting proteins (adapted from Interaction of calcineurin with substrates and targeting proteins. Huiming Li, Anjana Rao and Patrick G. Hogan, Trends Cell Biol., 2011, 21: 91-103). The mutated residue encoded by *folA1* (D18N) is highlighted in red. b) Sequence alignment of the calcineurin-binding region B in human NFAT1 to -4 and the calcineurin inhibitor DSCR1 (taken from Transcriptional regulation by calcium, calcineurin, and NFAT. Patrick G. Hogan, Lin Chen, Julie Nardone, et al. *Genes Dev.* 2003, 17: 2205-2232). These sequences were realigned including the sequence of *FoIA* using T-coffee with standard options at (<http://www.tcoffee.org/> XXREF T-Coffee: a web server for the multiple sequence alignment of protein and RNA sequences using structural information and homology extension. Paolo Di Tommaso, Sebastien Moretti, Ioannis Xenarios, Miquel Orobitg, Alberto Montanyola, Jia-Ming Chang, Jean-François Taly and Cedric Notredame, Nucl. Acids Res. 2011, 39 (suppl 2): W13-W17).
