# Supplementary material for: Genetic Bypass of Aspergillus nidulans crzA Function in Calcium Homeostasis
Source: PubMed Central journal article supplement (PMC3704241; doi:10.1534/g3.113.005983), 2013-07-01
Supplement: supp_g3.113.005983_FileS1.pdf [file supp_g3.113.005983_FileS1.pdf]

## File S1

### Mapping of *crzA* suppressor mutations using classical genetic techniques

The standard parasexual and sexual cycle mapping techniques (Clutterbuck, 1974) were used in conjunction with Clutterbuck's genetic map ([www.fgsc.net/Aspergillus/gene\\_list/index.html](http://www.fgsc.net/Aspergillus/gene_list/index.html)) and the (partially) annotated genome sequence ([www.aspgd.org/](http://www.aspgd.org/)) to determine map positions relative to those of identified genes.

**Genetic mapping of *cnaB*:** The thermosensitive mutation provisionally designated *scrA1* and now designated *cnaB1* and the mutation provisionally designated *rev2* and now designated *cnaB2* were both located to linkage group I using the parasexual cycle. As both of these mutations showed close linkage to *pabaA1* in preliminary crosses and might therefore be allelic, further localization was done only with *cnaB1*. Using selected progeny a cross of genotype *biA1 lysF51* x *yA2 cnaB2 pabaA1* was analysed. Of 51 *pabaA*<sup>+</sup> *lysF*<sup>+</sup> progeny, 3 carried *cnaB2*, 9 carried *yA2* and 40 carried *biA1*; of 51 *cnaB*<sup>+</sup> *lysF*<sup>+</sup> progeny, 24 carried *pabaA1*, 15 carried *yA2* and 36 carried *biA1*; of 12 *cnaB*<sup>+</sup> *pabaA*<sup>+</sup> progeny, 11 carried *lysF51*, 11 carried *yA2* and 3 carried *biA1*. These data clearly indicate the order *biA*—*yA*—*cnaB*—*pabaA*—*lysF*.

**Genetic mapping of *folA*:** The thermosensitive mutation provisionally designated *scrB2* and now designated *folA1* was located to linkage group III using the parasexual cycle. As *scrC* is also in linkage group III (see below), a *folA1* x *scrC3* cross was analysed and indicated free recombination as did a *folA1* cross to a strain carrying the *scrC*-linked *halA24* and *cbxA17* mutations. Following crosses indicating free recombination between *folA1* and a number of other linkage group III markers, random progeny from a cross involving *meaB6*, *cnxH3* and *sC12* suggested linkage and the order *folA*—*meaB*—*cnxH*—*sC*. A cross involving *folA1* and *galE9*, *meaB6*, *cnxH3* and *sC12* gave inconclusive results with regard to gene order with a slight and misleading (owing to insufficient numbers of progeny) indication that *folA* might lie between *galE* and *meaB*. Analysis of progeny able to grow at 42° C from a cross of partial genotype *galE9 folA1 meaB6 sC12* x *nudR825* established that *folA* is centromere-distal to *nudR*. Finally, analysis of 56 *gapA*<sup>+</sup> *folA*<sup>+</sup> progeny from a cross of relevant partial genotype *gapAΔ* x *folA1 galE9 meaB6 cnxH3 sC12* showed that 4 carried *galE9*, 9 carried *meaB6* and 11 carried *cnxH3* and along with analysis of 100 random progeny showed that the *gapA* to *galE* map distance is greater than either the *gapA* to *folA* or the *folA* to *galE* map distance. Taken together these mapping crosses plus the genome sequence indicate the gene order as *gapA*—*folA*—*galE*—*nudR*—*meaB*—*cnxH*—*sC*.

**Genetic mapping of *scrC*:** Mutations provisionally designated *rev1* and *rev3* and now designated *scrC4* and *scrC3*, respectively, were located to linkage group III using the parasexual cycle. As these suppressor mutations have similar phenotypes, meiotic analysis was done only with *scrC3*. The first cross to be analysed established close linkage between *scrC3* and *cbxA17*. A subsequent cross involving *scrC3*, *cbxA17* and *halAΔ* established that *scrC* lies between *cbxA* and *halA* in close proximity to *halA*.
