# Supplementary material for: Genetic Bypass of Aspergillus nidulans crzA Function in Calcium Homeostasis
Source: PubMed Central journal article supplement (PMC3704241; doi:10.1534/g3.113.005983), 2013-07-01
Supplement: supp_g3.113.005983_TableS1.pdf [file supp_g3.113.005983_TableS1.pdf]

**Table S1 Primers and Lux probes used in this work**

|                  |                                                            |
|------------------|------------------------------------------------------------|
| An8823 pRS426 5F | 5' GTAACGCCAGGGTTTTCCAGTCACGACGGTTCACAGGTGGATGGAGC 3'      |
| An8823 pyro 5R   | 5' GACCCAACAACCATGATACCACTCGGCCACTTATCACTCAAC 3'           |
| An8823 pyro 3F   | 5' CTGTCGATCATGTGGATGCTGTTGGCTATCAGAATTCTGGGTTTAG 3'       |
| An8823 pRS426 3R | 5' GCGGATAACAATTTACACAGGAAACAGCCTATCCTTATTCGCAACTCCCTGC 3' |
| An8823_RL        | 5' GAGATACGAGACGCAGGTCCG[FAM]G 3'                          |
| An8823_FL/RL     | 5' CCCGTGGCTTCCAACAACAT 3'                                 |
| An8823 pRS 5F    | 5' GTAACGCCAGGGTTTTCCAGTCACGACGGTTCACAGGTGGATGGAGC 3'      |
| An8823 pyro 5R   | 5' GACCCAACAACCATGATACCACTCGGCCACTTATCACTCAAC 3'           |
| An8823 pyro 3F   | 5' CTGTCGATCATGTGGATGCTGTTGGCTATCAGAATTCTGGGTTTAG 3'       |
| An8823 pRS 3R    | 5' GCGGATAACAATTTACACAGGAAACAGCCTATCCTTATTCGCAACTCCCTGC 3' |
| pmcA probe Lux   | 5'-CGGACCTTCAATGCCTGGTTGTC[FAM]G 3'                        |
| pmcA primer Lux  | 5'-GGGAGGCGTTCAAGTTCGAT-3'                                 |
| pmcB probe Lux   | 5'-CGGATTCTTCAACCCAGACATC[FAM]G 3'                         |
| pmcB primer Lux  | 5'-CCAGACAAAGGTGTTGAAGACGA-3'                              |
