# Supplementary material for: Genetic Bypass of Aspergillus nidulans crzA Function in Calcium Homeostasis
Source: PubMed Central journal article supplement (PMC3704241; doi:10.1534/g3.113.005983), 2013-07-01
Supplement: supp_g3.113.005983_TableS2.pdf [file supp_g3.113.005983_TableS2.pdf]

**Table S2 Analyses of the sexual crossings between the suppressors with wild-type strains**

| Parentals          |     | Phenotypes                      |                                 |                                 |                                 | Total |
|--------------------|-----|---------------------------------|---------------------------------|---------------------------------|---------------------------------|-------|
|                    |     | Ca <sup>R</sup> ts <sup>+</sup> | Ca <sup>R</sup> ts <sup>-</sup> | Ca <sup>S</sup> ts <sup>+</sup> | Ca <sup>S</sup> ts <sup>-</sup> |       |
| <i>folA1 crzAΔ</i> | GR5 | 108                             | 131                             | 53                              | 0                               | 292   |
| <i>cnaB1 crzAΔ</i> | R21 | 255                             | 22                              | 19                              | 0                               | 296   |

Ca<sup>R</sup>ts<sup>+</sup>, calcium-resistant and thermoresistant to 44°C. Ca<sup>R</sup>ts<sup>-</sup>, calcium-resistant and thermosensitive to 44°C. Ca<sup>S</sup>ts<sup>+</sup>, calcium-sensitive and thermoresistant to 44°C. Ca<sup>S</sup>ts<sup>-</sup>, calcium-sensitive and thermosensitive to 44°C.
